# Supplementary material for: Bidirectional histone monoaminylation dynamics regulate neural rhythmicity
Source: Springer Nature journal article supplement (doi:10.1038/s41586-024-08371-3), 2025-01-08
Supplement: MOESM2 [file 41586_2024_8371_MOESM2_ESM.pdf]

Reporting Summary

Nature Portfolio wishes to improve the reproducibility of the work that we publish. This form provides structure for consistency and transparency in reporting. For further information on Nature Portfolio policies, see our [Editorial Policies](#) and the [Editorial Policy Checklist](#).

Statistics

For all statistical analyses, confirm that the following items are present in the figure legend, table legend, main text, or Methods section.

|                                     |                                                                                                                                                                                                                                                                                                |
|-------------------------------------|------------------------------------------------------------------------------------------------------------------------------------------------------------------------------------------------------------------------------------------------------------------------------------------------|
| n/a                                 | Confirmed                                                                                                                                                                                                                                                                                      |
| <input type="checkbox"/>            | <input checked="" type="checkbox"/> The exact sample size ( <i>n</i> ) for each experimental group/condition, given as a discrete number and unit of measurement                                                                                                                               |
| <input type="checkbox"/>            | <input checked="" type="checkbox"/> A statement on whether measurements were taken from distinct samples or whether the same sample was measured repeatedly                                                                                                                                    |
| <input type="checkbox"/>            | <input checked="" type="checkbox"/> The statistical test(s) used AND whether they are one- or two-sided<br><i>Only common tests should be described solely by name; describe more complex techniques in the Methods section.</i>                                                               |
| <input checked="" type="checkbox"/> | <input type="checkbox"/> A description of all covariates tested                                                                                                                                                                                                                                |
| <input type="checkbox"/>            | <input checked="" type="checkbox"/> A description of any assumptions or corrections, such as tests of normality and adjustment for multiple comparisons                                                                                                                                        |
| <input type="checkbox"/>            | <input checked="" type="checkbox"/> A full description of the statistical parameters including central tendency (e.g. means) or other basic estimates (e.g. regression coefficient) AND variation (e.g. standard deviation) or associated estimates of uncertainty (e.g. confidence intervals) |
| <input type="checkbox"/>            | <input checked="" type="checkbox"/> For null hypothesis testing, the test statistic (e.g. <i>F</i> , <i>t</i> , <i>r</i> ) with confidence intervals, effect sizes, degrees of freedom and <i>P</i> value noted<br><i>Give P values as exact values whenever suitable.</i>                     |
| <input checked="" type="checkbox"/> | <input type="checkbox"/> For Bayesian analysis, information on the choice of priors and Markov chain Monte Carlo settings                                                                                                                                                                      |
| <input checked="" type="checkbox"/> | <input type="checkbox"/> For hierarchical and complex designs, identification of the appropriate level for tests and full reporting of outcomes                                                                                                                                                |
| <input checked="" type="checkbox"/> | <input type="checkbox"/> Estimates of effect sizes (e.g. Cohen's <i>d</i> , Pearson's <i>r</i> ), indicating how they were calculated                                                                                                                                                          |

Our web collection on [statistics for biologists](#) contains articles on many of the points above.

Software and code

Policy information about [availability of computer code](#)

|                 |                                                                                                                                                                                                                                                                                                                                                                                                                                                                                                                                                                                                                                                                                                                                                                                                                                                                                                                                                                                                                                                                                                                                                                                                                                                                                                                                                                                                                                                                                                                                                                                                                                                                                                                                                                                                                                                                                                                                                                                                                                                                                                                                                                                                                                                           |
|-----------------|-----------------------------------------------------------------------------------------------------------------------------------------------------------------------------------------------------------------------------------------------------------------------------------------------------------------------------------------------------------------------------------------------------------------------------------------------------------------------------------------------------------------------------------------------------------------------------------------------------------------------------------------------------------------------------------------------------------------------------------------------------------------------------------------------------------------------------------------------------------------------------------------------------------------------------------------------------------------------------------------------------------------------------------------------------------------------------------------------------------------------------------------------------------------------------------------------------------------------------------------------------------------------------------------------------------------------------------------------------------------------------------------------------------------------------------------------------------------------------------------------------------------------------------------------------------------------------------------------------------------------------------------------------------------------------------------------------------------------------------------------------------------------------------------------------------------------------------------------------------------------------------------------------------------------------------------------------------------------------------------------------------------------------------------------------------------------------------------------------------------------------------------------------------------------------------------------------------------------------------------------------------|
| Data collection | No custom algorithms were used.                                                                                                                                                                                                                                                                                                                                                                                                                                                                                                                                                                                                                                                                                                                                                                                                                                                                                                                                                                                                                                                                                                                                                                                                                                                                                                                                                                                                                                                                                                                                                                                                                                                                                                                                                                                                                                                                                                                                                                                                                                                                                                                                                                                                                           |
| Data analysis   | <p>RNA-seq data analysis</p> <p>Raw sequencing reads were demultiplexed using bcl2fastq2 (Illumina, v2.20). Samples were aligned to the GRCm38 (UCSC build GCA_000001635.2) mouse genome using STAR (v2.7.11b) alignReads in mode BAM SortedByCoordinate. Gene counts were generated using htseq-count (HTSeq v2.0.5) with the following parameters: --format=bam --minqual=10 --type=exon --idattr=gene_name --stranded=yes --mode=union using the Ensembl v93 annotation. Gene counts were normalized using DEseq2 (v1.44.0) prior to analysis using JTKcycle (v3.1) to identify cycling genes from the dataset using the parameters jtkdist (varying depending on replicates), periods(2:6) and jtk.init(periods,4). Genes with an ADJ.P &lt; 0.05 were deemed significant and Z-scores were computed in R using tidyverse (v2.0.0). heatmap.2 in R was used to visualize the cycle genes (gplots version 3.1.3.1) across the zeitgeber. Cyclic genes were further assessed using ChEA in Enrichr (<a href="https://maayanlab.cloud/Enrichr/">https://maayanlab.cloud/Enrichr/</a>, v3.2), which infers transcription factor regulation from integration of previous genome-wide chromatin immunoprecipitation (ChIP) analyses. Further ontology was also conducted using Enrichr (v3.2). Odds ratios were calculated using the GeneOverlap R package (Version 1.26.0). DEseq2 (v1.44.0) was run to perform pairwise differential expression analyses between H3.3 and GFP viral treated samples (to ensure limited to no significant differences between control groups; number of DEGs between GFP vs. H3.3 WT at: ZT0 = 1, ZT4 = 0, ZT8 = 0, ZT12 = 40, ZT16 = 1, ZT20 = 1) before combining them together to run JTKcycle, as previously described. Differentially expressed (DE) genes were defined at FDR &lt; .01. Overlap of JTK cycle genes with peak lists from CUT&amp;RUN-seq (see below) was performed in R using dplyr (v1.1.4). Individual circadian rhythm controlling genes identified in Enrichr (v3.2) were highlighted on heatmaps manually.</p> <p>CUT&amp;RUN-seq data analysis</p> <p>Raw sequencing files were demultiplexed using bcl2fastq2 (Illumina, v2.20). Between 20-100 million total reads were achieved for each</p> |

replicate (average 42.6 million). Samples were aligned to the hg19 or mm10 genome using bowtie2 (2.5.0), with the following parameters: --local --very-sensitive-local --phred33 -l 10 -X 700 --dovetail --no-unal --no-mixed --no-discordant. Low quality reads were filtered out using Samtools (v1.9) with a cutoff MAPQ score of 30, and only unique reads were kept for further processing. Unique read files for each replicate/timepoint/antibody were merged and used for peak calling using MACS2 (v3.0.0a6) with the callpeaks function and the options -f BAMPE -q 0.05 --broad --broad-cutoff .05, using the corresponding IgG sample as the -c. For visualization, each sample was normalized by scaling the samples based off the E. coli spike-in DNA. Each sample was aligned to the E. coli genome (MG1655), and the uniquely aligned reads counted. The number of E. coli reads for each replicate between timepoints was compared, with the sample with the lowest number of E. coli reads set at a scaling factor of 1X. The other samples were scaled down by a scaling factor that was computed by dividing the lowest number of E. coli reads by the sample number of E. coli reads. This was done separately for each antibody, as an internal normalization between timepoints across zeitgeber time. The same was done comparing vehicle and zolpidem treated animals. Genome coverage tracks (bigwig files) were produced using deepTools (3.5.1) bamCoverage function with the options --binSize 10 --smoothLength 30 --normalizeUsing None --scaleFactor # (derived from E. coli spike in) and using an ENCODE hg19 or mm10 blacklist file (<https://doi.org/10.1038/s41598-019-45839-z>, hg19.v2/mm10v2) to discard regions with consistently non-specific signal. Peak annotation and motif analysis of MACS2 called peaks were performed using HOMER (v4.11). Heatmaps were made using DeepTools (v3.5.5) computeMatrix and plotHeatmaps in reference-point mode, centered over TSSs or peak centers, using binSize 10 and --sortUsing mean, sorted in descending order. TSSs were downloaded from the UCSC (mm10;gencode VM23/hg19;gencode V45lift37) table browser using the canonically annotated transcript for each gene. Overlap of various peaks and TSSs was achieved using bedtools intersect (v2.31). For generation of average plot profiles (+/-500 bp of TSS) and input for running JTK cycle on H3K4me3Q5his and H3K4me3Q5ser marks, DeepTools computeMatrix was run centered over TSSs with the parameters -a 500 -b 500 --binSize 100. The resulting matrix and coordinates files were merged in R using dplyr (v1.1.4), and the average signal over the 1kb window for each timepoint was computed for the plot profiles. For JTK cycle, the average signal over the same 1kb window was computed for all individual biological replicates, and JTK cycle (v3.1) was run with the options jtkdist(6,3), periods(2:6), and jtk.init(periods,4). Genes with a ADJ.P < 0.05 were further analyzed, with Z-scores being computed in R using tidyverse (v2.0.0) and plotted as a heatmap using the function heatmap.2 (gplots version 3.1.3.1).

For manuscripts utilizing custom algorithms or software that are central to the research but not yet described in published literature, software must be made available to editors and reviewers. We strongly encourage code deposition in a community repository (e.g. GitHub). See the Nature Portfolio [guidelines for submitting code & software](#) for further information.

## Data

Policy information about [availability of data](#)

All manuscripts must include a [data availability statement](#). This statement should provide the following information, where applicable:

- Accession codes, unique identifiers, or web links for publicly available datasets
- A description of any restrictions on data availability
- For clinical datasets or third party data, please ensure that the statement adheres to our [policy](#)

The RNA-seq data and CUT&RUN-seq data generated in this study have been deposited in the National Center for Biotechnology Information Gene Expression Omnibus (GEO) database under accession number GSE270434. Raw files for the H3Q5his mass spectrometry proteomics data in 293T cells, as well as the mass spectrometry proteomics data have been deposited to the ProteomeXchange Consortium via the PRIDE partner repository with the dataset identifiers PXD053429 and PXD053788. The atomic coordinates and structure factors have been deposited in the Protein Data Bank (PDB) under PDB ID code 8HMX. We declare that the data supporting findings for this study are available within the article and Supplementary Information. Related data are available from the corresponding author upon reasonable request. No restrictions on data availability apply.

## Human research participants

Policy information about [studies involving human research participants and Sex and Gender in Research](#).

Reporting on sex and gender

N/A

Population characteristics

N/A

Recruitment

N/A

Ethics oversight

N/A

Note that full information on the approval of the study protocol must also be provided in the manuscript.

## Field-specific reporting

Please select the one below that is the best fit for your research. If you are not sure, read the appropriate sections before making your selection.

- ☒ Life sciences ☐ Behavioural & social sciences ☐ Ecological, evolutionary & environmental sciences

For a reference copy of the document with all sections, see [nature.com/documents/nr-reporting-summary-flat.pdf](https://www.nature.com/documents/nr-reporting-summary-flat.pdf)

# Life sciences study design

All studies must disclose on these points even when the disclosure is negative.

|                 |                                                                                                                                                                                                                                                                                                                                                                                                                                                                                                                                                                      |
|-----------------|----------------------------------------------------------------------------------------------------------------------------------------------------------------------------------------------------------------------------------------------------------------------------------------------------------------------------------------------------------------------------------------------------------------------------------------------------------------------------------------------------------------------------------------------------------------------|
| Sample size     | Adequate sample sizes are generally determined based upon inter-sample variability. Throughout the manuscript, we determined the significance of results based upon a general confidence interval of 95%. We do not include specific justifications of sample size within the methods (e.g., power analyses), as sample sizes were based on extensive laboratory experience with these endpoints. The sample sizes chosen are consistent with those used by others in the field to achieve statistically significant results comparing stressed vs. control animals. |
| Data exclusions | No data exclusions.                                                                                                                                                                                                                                                                                                                                                                                                                                                                                                                                                  |
| Replication     | All biological endpoints were reliably reproduced using numerous biological (>3 for all experiments in which statistics were employed) and technical replicates for each experiment. All novel reagents used in this study were extensively validated, as demonstrated in the manuscript submission.                                                                                                                                                                                                                                                                 |
| Randomization   | Where appropriate, animals were randomly assigned to groups (segregated by viral treatments, or ZT). Tissue samples were not pooled from multiple animals in these studies for western-blotting and RNA-seq experiments (i.e., each n represents a discrete data point). For CUT&RUN, each replicate per antibody was pooled from punches from 3 animals (per n) for initial processing, with 3 independent biological replicates conducted (n=3) per antibody.                                                                                                      |
| Blinding        | For all viral experiments (RNA-seq, western blotting and behavior), investigators were blinded to conditions such viral treatment etc. prior to analysis.                                                                                                                                                                                                                                                                                                                                                                                                            |

## Reporting for specific materials, systems and methods

We require information from authors about some types of materials, experimental systems and methods used in many studies. Here, indicate whether each material, system or method listed is relevant to your study. If you are not sure if a list item applies to your research, read the appropriate section before selecting a response.

### Materials & experimental systems

| n/a                                 | Involved in the study                                           |
|-------------------------------------|-----------------------------------------------------------------|
| <input type="checkbox"/>            | <input checked="" type="checkbox"/> Antibodies                  |
| <input type="checkbox"/>            | <input checked="" type="checkbox"/> Eukaryotic cell lines       |
| <input checked="" type="checkbox"/> | <input type="checkbox"/> Palaeontology and archaeology          |
| <input type="checkbox"/>            | <input checked="" type="checkbox"/> Animals and other organisms |
| <input checked="" type="checkbox"/> | <input type="checkbox"/> Clinical data                          |
| <input checked="" type="checkbox"/> | <input type="checkbox"/> Dual use research of concern           |

### Methods

| n/a                                 | Involved in the study                           |
|-------------------------------------|-------------------------------------------------|
| <input type="checkbox"/>            | <input checked="" type="checkbox"/> ChIP-seq    |
| <input checked="" type="checkbox"/> | <input type="checkbox"/> Flow cytometry         |
| <input checked="" type="checkbox"/> | <input type="checkbox"/> MRI-based neuroimaging |

## Antibodies

### Antibodies used

Primary antibodies used in this study:  
 Rabbit Anti-TGM2 1:500 (brain) Abcam  
 CUB 7402  
 Rabbit Anti-GAPDH 1:1000 (Western) Thermo-Fisher  
 PA1-16777  
 1: 1000 (in vitro and in cellulo) CST  
 (3557S)  
 Chicken Anti-H3 1: 1000 Abcam  
 (ab134198)  
 Mouse Anti-H3 1: 1000 Abcam  
 (ab10799)  
 Mouse Anti-Actin 1: 1000 CST  
 (3700S)  
 Rabbit Anti-H3Q5ser 1: 1000 Millipore  
 (ABE1791)  
 Rabbit Anti-H3Q5dop 1: 1000 Millipore  
 (ABE2588)  
 Rabbit Anti-H3Q5his 1: 200 (brain)  
 1:1000 (in vitro and in cellulo) Millipore  
 (ABE2578)  
 Rabbit Anti-H3K4me3Q5ser 1:50 (CUT&RUN), 1:500 (Western) Millipore  
 (ABE2605)  
 Rabbit Anti-H3K4me3Q5his 1:50 (CUT&RUN), 1:500 (Western) Millipore  
 (ABE2570)  
 Rabbit Anti-H3K4me3 1:1000 Abcam  
 (ab8580)

Rabbit Anti-H3K4me3 1:50 (CUT&RUN), 1:500 (Western) Epicypher (13-0041)

Rabbit Anti-H3K4me2 1:1000 Abcam (ab7766)

Rabbit Anti-H3K4me2 1:50 (CUT&RUN) Active Motif (39141)

Rabbit Anti-H3K27ac 1:1000 Active Motif (AB\_2614979)

Rabbit Anti-H3 1:50000 (brain) Abcam (ab1791)

Rabbit Anti-WDR5 1:50 (CUT&RUN) CST (13105)

Rabbit Anti-WDR5 1:1000 Abcam (ab307664)

Mouse Anti-FLAG M2 1:1000 Millipore Sigma (F1804)

Chicken Anti-6XHis 1:1000 Invitrogen (PA19531)

Rabbit Anti-HDC 1:1000 ARP (03-16045)

Rabbit Anti-NeuN 1:1000 Millipore Sigma (MAB377)

Donkey Anti-Chicken IRDye 800CW 1: 15000 (Li-Cor 926-32218)

Goat anti-Chicken IgY (H+L) Secondary Antibody, Alexa Fluor™ 488, 1:500 Invitrogen (for H3 peptide quantification) (Thermo Fisher A-11039)

Goat Anti-Mouse IRDye 680RD 1: 15000 (Li-Cor 926-68070)

Goat Anti-Mouse IRDye 800CW 1: 15000 (Li-Cor 926-32210)

Goat Anti-Rabbit IRDye 800CW 1: 15000 (Li-Cor 926-32211)

Goat Anti-Rabbit IRDye 680RD 1: 15000 (Li-Cor 926-68071)

Goat Anti-Rabbit Horseradish Peroxidase 1:10000

1:50000 (for anti-H3 antibody) (BioRad 1706515)

Sheep Anti-Mouse Horseradish Peroxidase 1:5000 (Cytiva RPN4201)

Donkey Anti-Rabbit Horseradish Peroxidase 1:5000 (Cytiva NA934)

#### Validation

All antibodies used in this study (all of which have been commercially validated (see manufacturers website) or described in previous publications) were validated in cells/tissues via immunoblotting, IPs or ICC/IHC/IF prior to experimentation. Validation of all primary antibodies was additionally provided according to the manufacturer's website/datasheet data. All information regarding validation of histone monoamination primary antibodies is included in the manuscript and in prior publications (cited in the manuscript).

## Eukaryotic cell lines

Policy information about [cell lines and Sex and Gender in Research](#)

#### Cell line source(s)

HeLa (CRM-CCL-2) and HEK293T (CRL-3216) cell lines were obtained from the American Type Culture Collection (ATCC).

#### Authentication

Human tissue culture cell lines (HeLa, HEK293T) were imaged for appropriate morphology.

#### Mycoplasma contamination

We can confirm that all cell lines tested negative for mycoplasma contamination.

#### Commonly misidentified lines (See [ICLAC](#) register)

No commonly misidentified cell lines were used.

## Animals and other research organisms

Policy information about [studies involving animals; ARRIVE guidelines](#) recommended for reporting animal research, and [Sex and Gender in Research](#)

#### Laboratory animals

Mice (C57BL/6J) were purchased from The Jackson Laboratory. Animals were group housed (2-5 per cage) on a 12-hour light/dark cycle (lights on from 7:00 A.M. to 7:00 P.M.) at constant temperature (23°C) and with controlled humidity (50%) and ad libitum access to food and water. All mice used for the experiments in this manuscript were aged 8-14 weeks old. All animal protocols were approved by the IACUC at the Icahn School of Medicine at Mount Sinai (ISMMS).

#### Wild animals

No wild animals were used in this study.

#### Reporting on sex

Both male and female mice were used in this study.

#### Field-collected samples

No field collected samples were used in this study.

#### Ethics oversight

All animal protocols were approved by the IACUC at both the Icahn School of Medicine at Mount Sinai (ISMMS).

Note that full information on the approval of the study protocol must also be provided in the manuscript.

# ChIP-seq

## Data deposition

- ☒ Confirm that both raw and final processed data have been deposited in a public database such as [GEO](#).
- ☒ Confirm that you have deposited or provided access to graph files (e.g. BED files) for the called peaks.

### Data access links

*May remain private before publication.*

The CUT&RUN-seq data generated in this study have been deposited in the National Center for Biotechnology Information Gene Expression Omnibus (GEO) database under accession number GSE270434. This includes the raw fastq files for each experiment, as well as bigwigs made from merged BAM files (merging the 3 biological replicates). These bigwigs were scaled according to an E. coli spike-in DNA for each CUT&RUN reaction, with scaling happening across time-points or treatments for the same antibody. See methods for details. MACS2 peak files (.broadPeak and .narrowPeak) are available in the GEO as well for certain time points/antibodies.

### Files in database submission

processed data file processed data file raw file raw file raw file raw file

0\_K2.scaled.bs10.bw K4me2\_ZT0\_lgG.BROAD.01\_peaks.broadPeak 0\_K2\_1\_S11\_L001\_R1\_001.fastq.gz  
 0\_K2\_1\_S11\_L001\_R2\_001.fastq.gz 0\_K2\_1\_S11\_L002\_R1\_001.fastq.gz 0\_K2\_1\_S11\_L002\_R2\_001.fastq.gz  
 0\_K2.scaled.bs10.bw K4me2\_ZT0\_lgG.BROAD.01\_peaks.broadPeak 0\_K2\_2\_S12\_L001\_R1\_001.fastq.gz  
 0\_K2\_2\_S12\_L001\_R2\_001.fastq.gz 0\_K2\_2\_S12\_L002\_R1\_001.fastq.gz 0\_K2\_2\_S12\_L002\_R2\_001.fastq.gz  
 0\_K2.scaled.bs10.bw K4me2\_ZT0\_lgG.BROAD.01\_peaks.broadPeak 0\_K2\_3\_S13\_L001\_R1\_001.fastq.gz  
 0\_K2\_3\_S13\_L001\_R2\_001.fastq.gz 0\_K2\_3\_S13\_L002\_R1\_001.fastq.gz 0\_K2\_3\_S13\_L002\_R2\_001.fastq.gz  
 4\_K2.scaled.bs10.bw 4\_K2\_1\_S17\_L001\_R1\_001.fastq.gz 4\_K2\_1\_S17\_L001\_R2\_001.fastq.gz  
 4\_K2\_1\_S17\_L002\_R1\_001.fastq.gz 4\_K2\_1\_S17\_L002\_R2\_001.fastq.gz  
 4\_K2.scaled.bs10.bw 4\_K2\_2\_S18\_L001\_R1\_001.fastq.gz 4\_K2\_2\_S18\_L001\_R2\_001.fastq.gz  
 4\_K2\_2\_S18\_L002\_R1\_001.fastq.gz 4\_K2\_2\_S18\_L002\_R2\_001.fastq.gz  
 4\_K2.scaled.bs10.bw 4\_K2\_3\_S19\_L001\_R1\_001.fastq.gz 4\_K2\_3\_S19\_L001\_R2\_001.fastq.gz  
 4\_K2\_3\_S19\_L002\_R1\_001.fastq.gz 4\_K2\_3\_S19\_L002\_R2\_001.fastq.gz  
 8\_K2.scaled.bs10.bw 8\_K2\_1\_S23\_L001\_R1\_001.fastq.gz 8\_K2\_1\_S23\_L001\_R2\_001.fastq.gz  
 8\_K2\_1\_S23\_L002\_R1\_001.fastq.gz 8\_K2\_1\_S23\_L002\_R2\_001.fastq.gz  
 8\_K2.scaled.bs10.bw 8\_K2\_2\_S24\_L001\_R1\_001.fastq.gz 8\_K2\_2\_S24\_L001\_R2\_001.fastq.gz  
 8\_K2\_2\_S24\_L002\_R1\_001.fastq.gz 8\_K2\_2\_S24\_L002\_R2\_001.fastq.gz  
 8\_K2.scaled.bs10.bw 8\_K2\_3\_S25\_L001\_R1\_001.fastq.gz 8\_K2\_3\_S25\_L001\_R2\_001.fastq.gz  
 8\_K2\_3\_S25\_L002\_R1\_001.fastq.gz 8\_K2\_3\_S25\_L002\_R2\_001.fastq.gz  
 12\_K2.scaled.bs10.bw 12\_K2\_1\_S29\_L001\_R1\_001.fastq.gz 12\_K2\_1\_S29\_L001\_R2\_001.fastq.gz  
 12\_K2\_1\_S29\_L002\_R1\_001.fastq.gz 12\_K2\_1\_S29\_L002\_R2\_001.fastq.gz  
 12\_K2.scaled.bs10.bw 12\_K2\_2\_S30\_L001\_R1\_001.fastq.gz 12\_K2\_2\_S30\_L001\_R2\_001.fastq.gz  
 12\_K2\_2\_S30\_L002\_R1\_001.fastq.gz 12\_K2\_2\_S30\_L002\_R2\_001.fastq.gz  
 12\_K2.scaled.bs10.bw 12\_K2\_3\_S31\_L001\_R1\_001.fastq.gz 12\_K2\_3\_S31\_L001\_R2\_001.fastq.gz  
 12\_K2\_3\_S31\_L002\_R1\_001.fastq.gz 12\_K2\_3\_S31\_L002\_R2\_001.fastq.gz  
 16\_K2.scaled.bs10.bw 16\_K2\_1\_S35\_L001\_R1\_001.fastq.gz 16\_K2\_1\_S35\_L001\_R2\_001.fastq.gz  
 16\_K2\_1\_S35\_L002\_R1\_001.fastq.gz 16\_K2\_1\_S35\_L002\_R2\_001.fastq.gz  
 16\_K2.scaled.bs10.bw 16\_K2\_2\_S36\_L001\_R1\_001.fastq.gz 16\_K2\_2\_S36\_L001\_R2\_001.fastq.gz  
 16\_K2\_2\_S36\_L002\_R1\_001.fastq.gz 16\_K2\_2\_S36\_L002\_R2\_001.fastq.gz  
 16\_K2.scaled.bs10.bw 16\_K2\_3\_S37\_L001\_R1\_001.fastq.gz 16\_K2\_3\_S37\_L001\_R2\_001.fastq.gz  
 16\_K2\_3\_S37\_L002\_R1\_001.fastq.gz 16\_K2\_3\_S37\_L002\_R2\_001.fastq.gz  
 20\_K2.scaled.bs10.bw 20\_K2\_1\_S41\_L001\_R1\_001.fastq.gz 20\_K2\_1\_S41\_L001\_R2\_001.fastq.gz  
 20\_K2\_1\_S41\_L002\_R1\_001.fastq.gz 20\_K2\_1\_S41\_L002\_R2\_001.fastq.gz  
 20\_K2.scaled.bs10.bw 20\_K2\_2\_S42\_L001\_R1\_001.fastq.gz 20\_K2\_2\_S42\_L001\_R2\_001.fastq.gz  
 20\_K2\_2\_S42\_L002\_R1\_001.fastq.gz 20\_K2\_2\_S42\_L002\_R2\_001.fastq.gz  
 20\_K2.scaled.bs10.bw 20\_K2\_3\_S43\_L001\_R1\_001.fastq.gz 20\_K2\_3\_S43\_L001\_R2\_001.fastq.gz  
 20\_K2\_3\_S43\_L002\_R1\_001.fastq.gz 20\_K2\_3\_S43\_L002\_R2\_001.fastq.gz  
 0\_K3.scaled.bs10.bw K4me3\_ZT0\_lgG.BROAD.05\_peaks.broadPeak 0\_K3\_1\_S14\_L001\_R1\_001.fastq.gz  
 0\_K3\_1\_S14\_L001\_R2\_001.fastq.gz 0\_K3\_1\_S14\_L002\_R1\_001.fastq.gz 0\_K3\_1\_S14\_L002\_R2\_001.fastq.gz  
 0\_K3.scaled.bs10.bw K4me3\_ZT0\_lgG.BROAD.05\_peaks.broadPeak 0\_K3\_2\_S15\_L001\_R1\_001.fastq.gz  
 0\_K3\_2\_S15\_L001\_R2\_001.fastq.gz 0\_K3\_2\_S15\_L002\_R1\_001.fastq.gz 0\_K3\_2\_S15\_L002\_R2\_001.fastq.gz  
 0\_K3.scaled.bs10.bw K4me3\_ZT0\_lgG.BROAD.05\_peaks.broadPeak 0\_K3\_3\_S16\_L001\_R1\_001.fastq.gz  
 0\_K3\_3\_S16\_L001\_R2\_001.fastq.gz 0\_K3\_3\_S16\_L002\_R1\_001.fastq.gz 0\_K3\_3\_S16\_L002\_R2\_001.fastq.gz  
 4\_K3.scaled.bs10.bw 4\_K3\_1\_S20\_L001\_R1\_001.fastq.gz 4\_K3\_1\_S20\_L001\_R2\_001.fastq.gz  
 4\_K3\_1\_S20\_L002\_R1\_001.fastq.gz 4\_K3\_1\_S20\_L002\_R2\_001.fastq.gz  
 4\_K3.scaled.bs10.bw 4\_K3\_2\_S21\_L001\_R1\_001.fastq.gz 4\_K3\_2\_S21\_L001\_R2\_001.fastq.gz  
 4\_K3\_2\_S21\_L002\_R1\_001.fastq.gz 4\_K3\_2\_S21\_L002\_R2\_001.fastq.gz  
 4\_K3.scaled.bs10.bw 4\_K3\_3\_S22\_L001\_R1\_001.fastq.gz 4\_K3\_3\_S22\_L001\_R2\_001.fastq.gz  
 4\_K3\_3\_S22\_L002\_R1\_001.fastq.gz 4\_K3\_3\_S22\_L002\_R2\_001.fastq.gz  
 8\_K3.scaled.bs10.bw 8\_K3\_1\_S26\_L001\_R1\_001.fastq.gz 8\_K3\_1\_S26\_L001\_R2\_001.fastq.gz  
 8\_K3\_1\_S26\_L002\_R1\_001.fastq.gz 8\_K3\_1\_S26\_L002\_R2\_001.fastq.gz  
 8\_K3.scaled.bs10.bw 8\_K3\_2\_S27\_L001\_R1\_001.fastq.gz 8\_K3\_2\_S27\_L001\_R2\_001.fastq.gz  
 8\_K3\_2\_S27\_L002\_R1\_001.fastq.gz 8\_K3\_2\_S27\_L002\_R2\_001.fastq.gz  
 8\_K3.scaled.bs10.bw 8\_K3\_3\_S28\_L001\_R1\_001.fastq.gz 8\_K3\_3\_S28\_L001\_R2\_001.fastq.gz  
 8\_K3\_3\_S28\_L002\_R1\_001.fastq.gz 8\_K3\_3\_S28\_L002\_R2\_001.fastq.gz  
 12\_K3.scaled.bs10.bw 12\_K3\_1\_S32\_L001\_R1\_001.fastq.gz 12\_K3\_1\_S32\_L001\_R2\_001.fastq.gz  
 12\_K3\_1\_S32\_L002\_R1\_001.fastq.gz 12\_K3\_1\_S32\_L002\_R2\_001.fastq.gz  
 12\_K3.scaled.bs10.bw 12\_K3\_2\_S33\_L001\_R1\_001.fastq.gz 12\_K3\_2\_S33\_L001\_R2\_001.fastq.gz  
 12\_K3\_2\_S33\_L002\_R1\_001.fastq.gz 12\_K3\_2\_S33\_L002\_R2\_001.fastq.gz

12\_K3.scaled.bs10.bw 12\_K3\_3\_S34\_L001\_R1\_001.fastq.gz 12\_K3\_3\_S34\_L001\_R2\_001.fastq.gz  
 12\_K3\_3\_S34\_L002\_R1\_001.fastq.gz 12\_K3\_3\_S34\_L002\_R2\_001.fastq.gz  
 16\_K3.scaled.bs10.bw 16\_K3\_1\_S38\_L001\_R1\_001.fastq.gz 16\_K3\_1\_S38\_L001\_R2\_001.fastq.gz  
 16\_K3\_1\_S38\_L002\_R1\_001.fastq.gz 16\_K3\_1\_S38\_L002\_R2\_001.fastq.gz  
 16\_K3.scaled.bs10.bw 16\_K3\_2\_S39\_L001\_R1\_001.fastq.gz 16\_K3\_2\_S39\_L001\_R2\_001.fastq.gz  
 16\_K3\_2\_S39\_L002\_R1\_001.fastq.gz 16\_K3\_2\_S39\_L002\_R2\_001.fastq.gz  
 16\_K3.scaled.bs10.bw 16\_K3\_3\_S40\_L001\_R1\_001.fastq.gz 16\_K3\_3\_S40\_L001\_R2\_001.fastq.gz  
 16\_K3\_3\_S40\_L002\_R1\_001.fastq.gz 16\_K3\_3\_S40\_L002\_R2\_001.fastq.gz  
 20\_K3.scaled.bs10.bw 20\_K3\_1\_S44\_L001\_R1\_001.fastq.gz 20\_K3\_1\_S44\_L001\_R2\_001.fastq.gz  
 20\_K3\_1\_S44\_L002\_R1\_001.fastq.gz 20\_K3\_1\_S44\_L002\_R2\_001.fastq.gz  
 20\_K3.scaled.bs10.bw 20\_K3\_2\_S45\_L001\_R1\_001.fastq.gz 20\_K3\_2\_S45\_L001\_R2\_001.fastq.gz  
 20\_K3\_2\_S45\_L002\_R1\_001.fastq.gz 20\_K3\_2\_S45\_L002\_R2\_001.fastq.gz  
 20\_K3.scaled.bs10.bw 20\_K3\_3\_S46\_L001\_R1\_001.fastq.gz 20\_K3\_3\_S46\_L001\_R2\_001.fastq.gz  
 20\_K3\_3\_S46\_L002\_R1\_001.fastq.gz 20\_K3\_3\_S46\_L002\_R2\_001.fastq.gz  
 0\_DH\_merged.scaled.bs10.bw 0\_DH\_1\_S29\_L001\_R1\_001.fastq.gz 0\_DH\_1\_S29\_L001\_R2\_001.fastq.gz  
 0\_DH\_1\_S29\_L002\_R1\_001.fastq.gz 0\_DH\_1\_S29\_L002\_R2\_001.fastq.gz  
 0\_DH\_merged.scaled.bs10.bw 0\_DH\_2\_S30\_L001\_R1\_001.fastq.gz 0\_DH\_2\_S30\_L001\_R2\_001.fastq.gz  
 0\_DH\_2\_S30\_L002\_R1\_001.fastq.gz 0\_DH\_2\_S30\_L002\_R2\_001.fastq.gz  
 0\_DH\_merged.scaled.bs10.bw 0\_DH\_3\_S31\_L001\_R1\_001.fastq.gz 0\_DH\_3\_S31\_L001\_R2\_001.fastq.gz  
 0\_DH\_3\_S31\_L002\_R1\_001.fastq.gz 0\_DH\_3\_S31\_L002\_R2\_001.fastq.gz  
 4\_DH.scaled.bs10.bw 4\_DH\_1\_S1\_L001\_R1\_001.fastq.gz 4\_DH\_1\_S1\_L001\_R2\_001.fastq.gz  
 4\_DH\_1\_S1\_L002\_R1\_001.fastq.gz 4\_DH\_1\_S1\_L002\_R2\_001.fastq.gz  
 4\_DH.scaled.bs10.bw 4\_DH\_2\_S2\_L001\_R1\_001.fastq.gz 4\_DH\_2\_S2\_L001\_R2\_001.fastq.gz  
 4\_DH\_2\_S2\_L002\_R1\_001.fastq.gz 4\_DH\_2\_S2\_L002\_R2\_001.fastq.gz  
 4\_DH.scaled.bs10.bw 4\_DH\_3\_S3\_L001\_R1\_001.fastq.gz 4\_DH\_3\_S3\_L001\_R2\_001.fastq.gz  
 4\_DH\_3\_S3\_L002\_R1\_001.fastq.gz 4\_DH\_3\_S3\_L002\_R2\_001.fastq.gz  
 8\_DH\_merged.scaled.bs10.bw 8\_DH\_1\_S49\_L001\_R1\_001.fastq.gz 8\_DH\_1\_S49\_L001\_R2\_001.fastq.gz  
 8\_DH\_1\_S49\_L002\_R1\_001.fastq.gz 8\_DH\_1\_S49\_L002\_R2\_001.fastq.gz  
 8\_DH\_merged.scaled.bs10.bw 8\_DH\_2\_S50\_L001\_R1\_001.fastq.gz 8\_DH\_2\_S50\_L001\_R2\_001.fastq.gz  
 8\_DH\_2\_S50\_L002\_R1\_001.fastq.gz 8\_DH\_2\_S50\_L002\_R2\_001.fastq.gz  
 8\_DH\_merged.scaled.bs10.bw 8\_DH\_3\_S51\_L001\_R1\_001.fastq.gz 8\_DH\_3\_S51\_L001\_R2\_001.fastq.gz  
 8\_DH\_3\_S51\_L002\_R1\_001.fastq.gz 8\_DH\_3\_S51\_L002\_R2\_001.fastq.gz  
 12\_DH\_merged.scaled.bs10.bw 12\_DH\_1\_S59\_L001\_R1\_001.fastq.gz 12\_DH\_1\_S59\_L001\_R2\_001.fastq.gz  
 12\_DH\_1\_S59\_L002\_R1\_001.fastq.gz 12\_DH\_1\_S59\_L002\_R2\_001.fastq.gz  
 12\_DH\_merged.scaled.bs10.bw 12\_DH\_2\_S60\_L001\_R1\_001.fastq.gz 12\_DH\_2\_S60\_L001\_R2\_001.fastq.gz  
 12\_DH\_2\_S60\_L002\_R1\_001.fastq.gz 12\_DH\_2\_S60\_L002\_R2\_001.fastq.gz  
 12\_DH\_merged.scaled.bs10.bw 12\_DH\_3\_S61\_L001\_R1\_001.fastq.gz 12\_DH\_3\_S61\_L001\_R2\_001.fastq.gz  
 12\_DH\_3\_S61\_L002\_R1\_001.fastq.gz 12\_DH\_3\_S61\_L002\_R2\_001.fastq.gz  
 16\_DH\_merged.scaled.bs10.bw DualHis\_ZT16\_IgG.BROAD.05\_peaks.broadPeak 16\_DH\_1\_S69\_L001\_R1\_001.fastq.gz  
 16\_DH\_1\_S69\_L001\_R2\_001.fastq.gz 16\_DH\_1\_S69\_L002\_R1\_001.fastq.gz 16\_DH\_1\_S69\_L002\_R2\_001.fastq.gz  
 16\_DH\_merged.scaled.bs10.bw DualHis\_ZT16\_IgG.BROAD.05\_peaks.broadPeak 16\_DH\_2\_S70\_L001\_R1\_001.fastq.gz  
 16\_DH\_2\_S70\_L001\_R2\_001.fastq.gz 16\_DH\_2\_S70\_L002\_R1\_001.fastq.gz 16\_DH\_2\_S70\_L002\_R2\_001.fastq.gz  
 16\_DH\_merged.scaled.bs10.bw DualHis\_ZT16\_IgG.BROAD.05\_peaks.broadPeak 16\_DH\_3\_S71\_L001\_R1\_001.fastq.gz  
 16\_DH\_3\_S71\_L001\_R2\_001.fastq.gz 16\_DH\_3\_S71\_L002\_R1\_001.fastq.gz 16\_DH\_3\_S71\_L002\_R2\_001.fastq.gz  
 20\_DH\_merged.scaled.bs10.bw 20\_DH\_1\_S79\_L001\_R1\_001.fastq.gz 20\_DH\_1\_S79\_L001\_R2\_001.fastq.gz  
 20\_DH\_1\_S79\_L002\_R1\_001.fastq.gz 20\_DH\_1\_S79\_L002\_R2\_001.fastq.gz  
 20\_DH\_merged.scaled.bs10.bw 20\_DH\_2\_S80\_L001\_R1\_001.fastq.gz 20\_DH\_2\_S80\_L001\_R2\_001.fastq.gz  
 20\_DH\_2\_S80\_L002\_R1\_001.fastq.gz 20\_DH\_2\_S80\_L002\_R2\_001.fastq.gz  
 20\_DH\_merged.scaled.bs10.bw 20\_DH\_3\_S81\_L001\_R1\_001.fastq.gz 20\_DH\_3\_S81\_L001\_R2\_001.fastq.gz  
 20\_DH\_3\_S81\_L002\_R1\_001.fastq.gz 20\_DH\_3\_S81\_L002\_R2\_001.fastq.gz  
 0\_DS\_merged.scaled.bs10.bw 0\_DS\_1\_S32\_L001\_R1\_001.fastq.gz 0\_DS\_1\_S32\_L001\_R2\_001.fastq.gz  
 0\_DS\_1\_S32\_L002\_R1\_001.fastq.gz 0\_DS\_1\_S32\_L002\_R2\_001.fastq.gz  
 0\_DS\_merged.scaled.bs10.bw 0\_DS\_2\_S33\_L001\_R1\_001.fastq.gz 0\_DS\_2\_S33\_L001\_R2\_001.fastq.gz  
 0\_DS\_2\_S33\_L002\_R1\_001.fastq.gz 0\_DS\_2\_S33\_L002\_R2\_001.fastq.gz  
 0\_DS\_merged.scaled.bs10.bw 0\_DS\_3\_S34\_L001\_R1\_001.fastq.gz 0\_DS\_3\_S34\_L001\_R2\_001.fastq.gz  
 0\_DS\_3\_S34\_L002\_R1\_001.fastq.gz 0\_DS\_3\_S34\_L002\_R2\_001.fastq.gz  
 4\_DS.scaled.bs10.bw 4\_DS\_1\_S4\_L001\_R1\_001.fastq.gz 4\_DS\_1\_S4\_L001\_R2\_001.fastq.gz  
 4\_DS\_1\_S4\_L002\_R1\_001.fastq.gz 4\_DS\_1\_S4\_L002\_R2\_001.fastq.gz  
 4\_DS.scaled.bs10.bw 4\_DS\_2\_S5\_L001\_R1\_001.fastq.gz 4\_DS\_2\_S5\_L001\_R2\_001.fastq.gz  
 4\_DS\_2\_S5\_L002\_R1\_001.fastq.gz 4\_DS\_2\_S5\_L002\_R2\_001.fastq.gz  
 4\_DS.scaled.bs10.bw 4\_DS\_3\_S6\_L001\_R1\_001.fastq.gz 4\_DS\_3\_S6\_L001\_R2\_001.fastq.gz  
 4\_DS\_3\_S6\_L002\_R1\_001.fastq.gz 4\_DS\_3\_S6\_L002\_R2\_001.fastq.gz  
 8\_DS\_merged.scaled.bs10.bw 8\_DS\_1\_S52\_L001\_R1\_001.fastq.gz 8\_DS\_1\_S52\_L001\_R2\_001.fastq.gz  
 8\_DS\_1\_S52\_L002\_R1\_001.fastq.gz 8\_DS\_1\_S52\_L002\_R2\_001.fastq.gz  
 8\_DS\_merged.scaled.bs10.bw 8\_DS\_2\_S53\_L001\_R1\_001.fastq.gz 8\_DS\_2\_S53\_L001\_R2\_001.fastq.gz  
 8\_DS\_2\_S53\_L002\_R1\_001.fastq.gz 8\_DS\_2\_S53\_L002\_R2\_001.fastq.gz  
 8\_DS\_merged.scaled.bs10.bw 8\_DS\_3\_S54\_L001\_R1\_001.fastq.gz 8\_DS\_3\_S54\_L001\_R2\_001.fastq.gz  
 8\_DS\_3\_S54\_L002\_R1\_001.fastq.gz 8\_DS\_3\_S54\_L002\_R2\_001.fastq.gz  
 12\_DS\_merged.scaled.bs10.bw 12\_DS\_1\_S62\_L001\_R1\_001.fastq.gz 12\_DS\_1\_S62\_L001\_R2\_001.fastq.gz  
 12\_DS\_1\_S62\_L002\_R1\_001.fastq.gz 12\_DS\_1\_S62\_L002\_R2\_001.fastq.gz  
 12\_DS\_merged.scaled.bs10.bw 12\_DS\_2\_S63\_L001\_R1\_001.fastq.gz 12\_DS\_2\_S63\_L001\_R2\_001.fastq.gz  
 12\_DS\_2\_S63\_L002\_R1\_001.fastq.gz 12\_DS\_2\_S63\_L002\_R2\_001.fastq.gz  
 12\_DS\_merged.scaled.bs10.bw 12\_DS\_3\_S64\_L001\_R1\_001.fastq.gz 12\_DS\_3\_S64\_L001\_R2\_001.fastq.gz  
 12\_DS\_3\_S64\_L002\_R1\_001.fastq.gz 12\_DS\_3\_S64\_L002\_R2\_001.fastq.gz  
 16\_DS\_merged.scaled.bs10.bw 16\_DS\_1\_S72\_L001\_R1\_001.fastq.gz 16\_DS\_1\_S72\_L001\_R2\_001.fastq.gz  
 16\_DS\_1\_S72\_L002\_R1\_001.fastq.gz 16\_DS\_1\_S72\_L002\_R2\_001.fastq.gz



16\_DS\_merged.scaled.bs10.bw 16\_DS\_2\_S73\_L001\_R1\_001.fastq.gz 16\_DS\_2\_S73\_L001\_R2\_001.fastq.gz  
 16\_DS\_2\_S73\_L002\_R1\_001.fastq.gz 16\_DS\_2\_S73\_L002\_R2\_001.fastq.gz  
 16\_DS\_merged.scaled.bs10.bw 16\_DS\_3\_S74\_L001\_R1\_001.fastq.gz 16\_DS\_3\_S74\_L001\_R2\_001.fastq.gz  
 16\_DS\_3\_S74\_L002\_R1\_001.fastq.gz 16\_DS\_3\_S74\_L002\_R2\_001.fastq.gz  
 20\_DS\_merged.scaled.bs10.bw 20\_DS\_1\_S82\_L001\_R1\_001.fastq.gz 20\_DS\_1\_S82\_L001\_R2\_001.fastq.gz  
 20\_DS\_1\_S82\_L002\_R1\_001.fastq.gz 20\_DS\_1\_S82\_L002\_R2\_001.fastq.gz  
 20\_DS\_merged.scaled.bs10.bw 20\_DS\_2\_S83\_L001\_R1\_001.fastq.gz 20\_DS\_2\_S83\_L001\_R2\_001.fastq.gz  
 20\_DS\_2\_S83\_L002\_R1\_001.fastq.gz 20\_DS\_2\_S83\_L002\_R2\_001.fastq.gz  
 20\_DS\_merged.scaled.bs10.bw 20\_DS\_3\_S84\_L001\_R1\_001.fastq.gz 20\_DS\_3\_S84\_L001\_R2\_001.fastq.gz  
 20\_DS\_3\_S84\_L002\_R1\_001.fastq.gz 20\_DS\_3\_S84\_L002\_R2\_001.fastq.gz  
 0\_WD\_merged.scaled.bs10.bw 0\_WD\_1\_S42\_L001\_R1\_001.fastq.gz 0\_WD\_1\_S42\_L001\_R2\_001.fastq.gz  
 0\_WD\_1\_S42\_L002\_R1\_001.fastq.gz 0\_WD\_1\_S42\_L002\_R2\_001.fastq.gz  
 0\_WD\_merged.scaled.bs10.bw 0\_WD\_2\_S43\_L001\_R1\_001.fastq.gz 0\_WD\_2\_S43\_L001\_R2\_001.fastq.gz  
 0\_WD\_2\_S43\_L002\_R1\_001.fastq.gz 0\_WD\_2\_S43\_L002\_R2\_001.fastq.gz  
 0\_WD\_merged.scaled.bs10.bw 0\_WD\_3\_S37\_L001\_R1\_001.fastq.gz 0\_WD\_3\_S37\_L001\_R2\_001.fastq.gz  
 0\_WD\_3\_S37\_L002\_R1\_001.fastq.gz 0\_WD\_3\_S37\_L002\_R2\_001.fastq.gz  
 4\_WD.scaled.bs10.bw 4\_WD\_1\_S7\_L001\_R1\_001.fastq.gz 4\_WD\_1\_S7\_L001\_R2\_001.fastq.gz  
 4\_WD\_1\_S7\_L002\_R1\_001.fastq.gz 4\_WD\_1\_S7\_L002\_R2\_001.fastq.gz  
 4\_WD.scaled.bs10.bw 4\_WD\_2\_S8\_L001\_R1\_001.fastq.gz 4\_WD\_2\_S8\_L001\_R2\_001.fastq.gz  
 4\_WD\_2\_S8\_L002\_R1\_001.fastq.gz 4\_WD\_2\_S8\_L002\_R2\_001.fastq.gz  
 4\_WD.scaled.bs10.bw 4\_WD\_3\_S9\_L001\_R1\_001.fastq.gz 4\_WD\_3\_S9\_L001\_R2\_001.fastq.gz  
 4\_WD\_3\_S9\_L002\_R1\_001.fastq.gz 4\_WD\_3\_S9\_L002\_R2\_001.fastq.gz  
 8\_WD\_merged.scaled.bs10.bw 8\_WD\_1\_S55\_L001\_R1\_001.fastq.gz 8\_WD\_1\_S55\_L001\_R2\_001.fastq.gz  
 8\_WD\_1\_S55\_L002\_R1\_001.fastq.gz 8\_WD\_1\_S55\_L002\_R2\_001.fastq.gz  
 8\_WD\_merged.scaled.bs10.bw 8\_WD\_2\_S56\_L001\_R1\_001.fastq.gz 8\_WD\_2\_S56\_L001\_R2\_001.fastq.gz  
 8\_WD\_2\_S56\_L002\_R1\_001.fastq.gz 8\_WD\_2\_S56\_L002\_R2\_001.fastq.gz  
 8\_WD\_merged.scaled.bs10.bw 8\_WD\_3\_S57\_L001\_R1\_001.fastq.gz 8\_WD\_3\_S57\_L001\_R2\_001.fastq.gz  
 8\_WD\_3\_S57\_L002\_R1\_001.fastq.gz 8\_WD\_3\_S57\_L002\_R2\_001.fastq.gz  
 12\_WD\_merged.scaled.bs10.bw 12\_WD\_1\_S65\_L001\_R1\_001.fastq.gz 12\_WD\_1\_S65\_L001\_R2\_001.fastq.gz  
 12\_WD\_1\_S65\_L002\_R1\_001.fastq.gz 12\_WD\_1\_S65\_L002\_R2\_001.fastq.gz  
 12\_WD\_merged.scaled.bs10.bw 12\_WD\_2\_S66\_L001\_R1\_001.fastq.gz 12\_WD\_2\_S66\_L001\_R2\_001.fastq.gz  
 12\_WD\_2\_S66\_L002\_R1\_001.fastq.gz 12\_WD\_2\_S66\_L002\_R2\_001.fastq.gz  
 12\_WD\_merged.scaled.bs10.bw 12\_WD\_3\_S67\_L001\_R1\_001.fastq.gz 12\_WD\_3\_S67\_L001\_R2\_001.fastq.gz  
 12\_WD\_3\_S67\_L002\_R1\_001.fastq.gz 12\_WD\_3\_S67\_L002\_R2\_001.fastq.gz  
 16\_WD\_merged.scaled.bs10.bw WDR5\_16\_IgG.05\_peaks.narrowPeak 16\_WD\_1\_S75\_L001\_R1\_001.fastq.gz  
 16\_WD\_1\_S75\_L001\_R2\_001.fastq.gz 16\_WD\_1\_S75\_L002\_R1\_001.fastq.gz 16\_WD\_1\_S75\_L002\_R2\_001.fastq.gz  
 16\_WD\_merged.scaled.bs10.bw WDR5\_16\_IgG.05\_peaks.narrowPeak 16\_WD\_2\_S76\_L001\_R1\_001.fastq.gz  
 16\_WD\_2\_S76\_L001\_R2\_001.fastq.gz 16\_WD\_2\_S76\_L002\_R1\_001.fastq.gz 16\_WD\_2\_S76\_L002\_R2\_001.fastq.gz  
 16\_WD\_merged.scaled.bs10.bw WDR5\_16\_IgG.05\_peaks.narrowPeak 16\_WD\_3\_S77\_L001\_R1\_001.fastq.gz  
 16\_WD\_3\_S77\_L001\_R2\_001.fastq.gz 16\_WD\_3\_S77\_L002\_R1\_001.fastq.gz 16\_WD\_3\_S77\_L002\_R2\_001.fastq.gz  
 20\_WD\_merged.scaled.bs10.bw 20\_WD\_1\_S85\_L001\_R1\_001.fastq.gz 20\_WD\_1\_S85\_L001\_R2\_001.fastq.gz  
 20\_WD\_1\_S85\_L002\_R1\_001.fastq.gz 20\_WD\_1\_S85\_L002\_R2\_001.fastq.gz  
 20\_WD\_merged.scaled.bs10.bw 20\_WD\_2\_S86\_L001\_R1\_001.fastq.gz 20\_WD\_2\_S86\_L001\_R2\_001.fastq.gz  
 20\_WD\_2\_S86\_L002\_R1\_001.fastq.gz 20\_WD\_2\_S86\_L002\_R2\_001.fastq.gz  
 20\_WD\_merged.scaled.bs10.bw 20\_WD\_3\_S87\_L001\_R1\_001.fastq.gz 20\_WD\_3\_S87\_L001\_R2\_001.fastq.gz  
 20\_WD\_3\_S87\_L002\_R1\_001.fastq.gz 20\_WD\_3\_S87\_L002\_R2\_001.fastq.gz  
 0\_IgG.scaled.bs10.bw 0\_IgG\_S38\_L001\_R1\_001.fastq.gz 0\_IgG\_S38\_L001\_R2\_001.fastq.gz  
 0\_IgG\_S38\_L002\_R1\_001.fastq.gz 0\_IgG\_S38\_L002\_R2\_001.fastq.gz  
 4\_IgG.scaled.bs10.bw 4\_IgG\_S10\_L001\_R1\_001.fastq.gz 4\_IgG\_S10\_L001\_R2\_001.fastq.gz  
 4\_IgG\_S10\_L002\_R1\_001.fastq.gz 4\_IgG\_S10\_L002\_R2\_001.fastq.gz  
 8\_IgG.scaled.bs10.bw 8\_IgG\_S58\_L001\_R1\_001.fastq.gz 8\_IgG\_S58\_L001\_R2\_001.fastq.gz  
 8\_IgG\_S58\_L002\_R1\_001.fastq.gz 8\_IgG\_S58\_L002\_R2\_001.fastq.gz  
 12\_IgG.scaled.bs10.bw 12\_IgG\_S68\_L001\_R1\_001.fastq.gz 12\_IgG\_S68\_L001\_R2\_001.fastq.gz  
 12\_IgG\_S68\_L002\_R1\_001.fastq.gz 12\_IgG\_S68\_L002\_R2\_001.fastq.gz  
 16\_IgG.scaled.bs10.bw 16\_IgG\_S78\_L001\_R1\_001.fastq.gz 16\_IgG\_S78\_L001\_R2\_001.fastq.gz  
 16\_IgG\_S78\_L002\_R1\_001.fastq.gz 16\_IgG\_S78\_L002\_R2\_001.fastq.gz  
 20\_IgG.scaled.bs10.bw 20\_IgG\_S88\_L001\_R1\_001.fastq.gz 20\_IgG\_S88\_L001\_R2\_001.fastq.gz  
 20\_IgG\_S88\_L002\_R1\_001.fastq.gz 20\_IgG\_S88\_L002\_R2\_001.fastq.gz  
 V\_WD.scaled.bs10.bw V\_WD\_1\_S53\_L001\_R1\_001.fastq.gz V\_WD\_1\_S53\_L001\_R2\_001.fastq.gz  
 V\_WD\_1\_S53\_L002\_R1\_001.fastq.gz V\_WD\_1\_S53\_L002\_R2\_001.fastq.gz  
 V\_WD.scaled.bs10.bw V\_WD\_2\_S54\_L001\_R1\_001.fastq.gz V\_WD\_2\_S54\_L001\_R2\_001.fastq.gz  
 V\_WD\_2\_S54\_L002\_R1\_001.fastq.gz V\_WD\_2\_S54\_L002\_R2\_001.fastq.gz  
 V\_WD.scaled.bs10.bw V\_WD\_3\_S55\_L001\_R1\_001.fastq.gz V\_WD\_3\_S55\_L001\_R2\_001.fastq.gz  
 V\_WD\_3\_S55\_L002\_R1\_001.fastq.gz V\_WD\_3\_S55\_L002\_R2\_001.fastq.gz  
 Z\_WD.scaled.bs10.bw Z\_WD\_1\_S63\_L001\_R1\_001.fastq.gz Z\_WD\_1\_S63\_L001\_R2\_001.fastq.gz  
 Z\_WD\_1\_S63\_L002\_R1\_001.fastq.gz Z\_WD\_1\_S63\_L002\_R2\_001.fastq.gz  
 Z\_WD.scaled.bs10.bw Z\_WD\_2\_S64\_L001\_R1\_001.fastq.gz Z\_WD\_2\_S64\_L001\_R2\_001.fastq.gz  
 Z\_WD\_2\_S64\_L002\_R1\_001.fastq.gz Z\_WD\_2\_S64\_L002\_R2\_001.fastq.gz  
 Z\_WD.scaled.bs10.bw Z\_WD\_3\_S65\_L001\_R1\_001.fastq.gz Z\_WD\_3\_S65\_L001\_R2\_001.fastq.gz  
 Z\_WD\_3\_S65\_L002\_R1\_001.fastq.gz Z\_WD\_3\_S65\_L002\_R2\_001.fastq.gz  
 V\_DH.scaled.bs10.bw V\_DH\_1\_S47\_L001\_R1\_001.fastq.gz V\_DH\_1\_S47\_L001\_R2\_001.fastq.gz  
 V\_DH\_1\_S47\_L002\_R1\_001.fastq.gz V\_DH\_1\_S47\_L002\_R2\_001.fastq.gz  
 V\_DH.scaled.bs10.bw V\_DH\_2\_S48\_L001\_R1\_001.fastq.gz V\_DH\_2\_S48\_L001\_R2\_001.fastq.gz  
 V\_DH\_2\_S48\_L002\_R1\_001.fastq.gz V\_DH\_2\_S48\_L002\_R2\_001.fastq.gz  
 V\_DH.scaled.bs10.bw V\_DH\_3\_S49\_L001\_R1\_001.fastq.gz V\_DH\_3\_S49\_L001\_R2\_001.fastq.gz  
 V\_DH\_3\_S49\_L002\_R1\_001.fastq.gz V\_DH\_3\_S49\_L002\_R2\_001.fastq.gz

Z\_DH.scaled.bs10.bw Z\_DH\_1\_S57\_L001\_R1\_001.fastq.gz Z\_DH\_1\_S57\_L001\_R2\_001.fastq.gz  
 Z\_DH\_1\_S57\_L002\_R1\_001.fastq.gz Z\_DH\_1\_S57\_L002\_R2\_001.fastq.gz  
 Z\_DH.scaled.bs10.bw Z\_DH\_2\_S58\_L001\_R1\_001.fastq.gz Z\_DH\_2\_S58\_L001\_R2\_001.fastq.gz  
 Z\_DH\_2\_S58\_L002\_R1\_001.fastq.gz Z\_DH\_2\_S58\_L002\_R2\_001.fastq.gz  
 Z\_DH.scaled.bs10.bw Z\_DH\_3\_S59\_L001\_R1\_001.fastq.gz Z\_DH\_3\_S59\_L001\_R2\_001.fastq.gz  
 Z\_DH\_3\_S59\_L002\_R1\_001.fastq.gz Z\_DH\_3\_S59\_L002\_R2\_001.fastq.gz  
 V\_DS.scaled.bs10.bw V\_DS\_1\_S50\_L001\_R1\_001.fastq.gz V\_DS\_1\_S50\_L001\_R2\_001.fastq.gz  
 V\_DS\_1\_S50\_L002\_R1\_001.fastq.gz V\_DS\_1\_S50\_L002\_R2\_001.fastq.gz  
 V\_DS.scaled.bs10.bw V\_DS\_2\_S51\_L001\_R1\_001.fastq.gz V\_DS\_2\_S51\_L001\_R2\_001.fastq.gz  
 V\_DS\_2\_S51\_L002\_R1\_001.fastq.gz V\_DS\_2\_S51\_L002\_R2\_001.fastq.gz  
 V\_DS.scaled.bs10.bw V\_DS\_3\_S52\_L001\_R1\_001.fastq.gz V\_DS\_3\_S52\_L001\_R2\_001.fastq.gz  
 V\_DS\_3\_S52\_L002\_R1\_001.fastq.gz V\_DS\_3\_S52\_L002\_R2\_001.fastq.gz  
 Z\_DS.scaled.bs10.bw Z\_DS\_1\_S60\_L001\_R1\_001.fastq.gz Z\_DS\_1\_S60\_L001\_R2\_001.fastq.gz  
 Z\_DS\_1\_S60\_L002\_R1\_001.fastq.gz Z\_DS\_1\_S60\_L002\_R2\_001.fastq.gz  
 Z\_DS.scaled.bs10.bw Z\_DS\_2\_S61\_L001\_R1\_001.fastq.gz Z\_DS\_2\_S61\_L001\_R2\_001.fastq.gz  
 Z\_DS\_2\_S61\_L002\_R1\_001.fastq.gz Z\_DS\_2\_S61\_L002\_R2\_001.fastq.gz  
 Z\_DS.scaled.bs10.bw Z\_DS\_3\_S62\_L001\_R1\_001.fastq.gz Z\_DS\_3\_S62\_L001\_R2\_001.fastq.gz  
 Z\_DS\_3\_S62\_L002\_R1\_001.fastq.gz Z\_DS\_3\_S62\_L002\_R2\_001.fastq.gz  
 V\_lgG.scaled.bs10.bw V\_lgG\_S56\_L001\_R1\_001.fastq.gz V\_lgG\_S56\_L001\_R2\_001.fastq.gz  
 V\_lgG\_S56\_L002\_R1\_001.fastq.gz V\_lgG\_S56\_L002\_R2\_001.fastq.gz  
 Z\_lgG.scaled.bs10.bw Z\_lgG\_S66\_L001\_R1\_001.fastq.gz Z\_lgG\_S66\_L001\_R2\_001.fastq.gz  
 Z\_lgG\_S66\_L002\_R1\_001.fastq.gz Z\_lgG\_S66\_L002\_R2\_001.fastq.gz  
 HELA\_DH\_merged.bs10.bw DualHisHela\_.BROAD.05\_peaks.broadPeak H\_DH\_1\_S1\_L001\_R1\_001.fastq.gz  
 H\_DH\_1\_S1\_L001\_R2\_001.fastq.gz H\_DH\_1\_S1\_L002\_R1\_001.fastq.gz H\_DH\_1\_S1\_L002\_R2\_001.fastq.gz  
 HELA\_DH\_merged.bs10.bw DualHisHela\_.BROAD.05\_peaks.broadPeak H\_DH\_2\_S2\_L001\_R1\_001.fastq.gz  
 H\_DH\_2\_S2\_L001\_R2\_001.fastq.gz H\_DH\_2\_S2\_L002\_R1\_001.fastq.gz H\_DH\_2\_S2\_L002\_R2\_001.fastq.gz  
 HELA\_DH\_merged.bs10.bw DualHisHela\_.BROAD.05\_peaks.broadPeak H\_DH\_3\_S3\_L001\_R1\_001.fastq.gz  
 H\_DH\_3\_S3\_L001\_R2\_001.fastq.gz H\_DH\_3\_S3\_L002\_R1\_001.fastq.gz H\_DH\_3\_S3\_L002\_R2\_001.fastq.gz  
 HELA\_Q5\_merged.bs10.bw singleHisHela\_.BROAD.05\_peaks.broadPeak H\_Q5\_1\_S7\_L001\_R1\_001.fastq.gz  
 H\_Q5\_1\_S7\_L001\_R2\_001.fastq.gz H\_Q5\_1\_S7\_L002\_R1\_001.fastq.gz H\_Q5\_1\_S7\_L002\_R2\_001.fastq.gz  
 HELA\_Q5\_merged.bs10.bw singleHisHela\_.BROAD.05\_peaks.broadPeak H\_Q5\_2\_S8\_L001\_R1\_001.fastq.gz  
 H\_Q5\_2\_S8\_L001\_R2\_001.fastq.gz H\_Q5\_2\_S8\_L002\_R1\_001.fastq.gz H\_Q5\_2\_S8\_L002\_R2\_001.fastq.gz  
 HELA\_Q5\_merged.bs10.bw singleHisHela\_.BROAD.05\_peaks.broadPeak H\_Q5\_3\_S9\_L001\_R1\_001.fastq.gz  
 H\_Q5\_3\_S9\_L001\_R2\_001.fastq.gz H\_Q5\_3\_S9\_L002\_R1\_001.fastq.gz H\_Q5\_3\_S9\_L002\_R2\_001.fastq.gz  
 H\_lgG1\_merged.sorted.RPKM.bs10.sl30.bw H\_lgG1\_S16\_L001\_R1\_001.fastq.gz H\_lgG1\_S16\_L001\_R2\_001.fastq.gz  
 H\_lgG1\_S16\_L002\_R1\_001.fastq.gz H\_lgG1\_S16\_L002\_R2\_001.fastq.gz

Genome browser session  
 (e.g. [UCSC](#))

Hela: <https://ramaka02.dmz.hpc.mssm.edu/UCSC-TrackHub-Ben-Weekly-hg19/>  
 TMN: <https://ramaka02.dmz.hpc.mssm.edu/UCSC-TrackHub-Ben-Weekly-mm10/>

## Methodology

### Replicates

There were 3 independent biological replicates for each antibody and timepoint/treatment, each coming from a biologically independent pool of TMN or plate of HeLa cells. These biological replicates were assessed for similarity visually in IGV and by comparing alignment rate, peak calling (between biological replicates), and heatmaps (using MACS2/Deeptools). All replicates had high concordance.

### Sequencing depth

| CUT&RUN Sample | Total Reads    | Mapped Reads  | Uniquely Mapped Reads |
|----------------|----------------|---------------|-----------------------|
| 0_DH_1_S29     | 27,310,000.00  | 19,138,070.00 | 15,231,930.00         |
| 0_DH_2_S30     | 33,857,086.00  | 22,542,838.00 | 17,311,850.00         |
| 0_DH_3_S31     | 37,720,716.00  | 24,222,108.00 | 19,511,182.00         |
| 0_DS_1_S32     | 36,834,540.00  | 21,906,184.00 | 19,646,366.00         |
| 0_DS_2_S33     | 24,263,036.00  | 18,676,828.00 | 17,707,738.00         |
| 0_DS_3_S34     | 27,866,782.00  | 19,837,988.00 | 17,410,712.00         |
| 0_lgG_S38      | 24,838,152.00  | 12,933,064.00 | 9,756,070.00          |
| 0_WD_1_S42     | 145,472,050.00 | 83,380,212.00 | 60,985,598.00         |
| 0_WD_2_S36     | 170,384,052.00 | 98,318,428.00 | 71,122,742.00         |
| 0_WD_3_S37     | 35,270,882.00  | 19,165,556.00 | 13,923,846.00         |
| 8_DH_1_S49     | 52,269,610.00  | 29,710,832.00 | 24,397,130.00         |
| 8_DH_2_S50     | 36,998,278.00  | 30,050,604.00 | 24,494,390.00         |
| 8_DH_3_S51     | 40,419,368.00  | 27,696,056.00 | 22,443,284.00         |
| 8_DS_1_S52     | 50,859,580.00  | 29,984,662.00 | 28,075,652.00         |
| 8_DS_2_S53     | 38,031,308.00  | 29,442,818.00 | 27,775,760.00         |
| 8_DS_3_S54     | 35,845,198.00  | 21,444,614.00 | 20,094,144.00         |
| 8_lgG_S58      | 43,005,152.00  | 1,299,376.00  | 895,190.00            |
| 8_WD_1_S55     | 41,689,350.00  | 3,633,800.00  | 2,762,854.00          |
| 8_WD_2_S56     | 38,382,544.00  | 2,285,056.00  | 1,725,408.00          |
| 8_WD_3_S57     | 50,556,268.00  | 4,423,702.00  | 3,387,026.00          |
| 12_DH_1_S59    | 42,259,492.00  | 28,133,104.00 | 21,629,474.00         |
| 12_DH_2_S60    | 30,616,660.00  | 15,163,518.00 | 12,479,764.00         |
| 12_DH_3_S61    | 40,945,708.00  | 23,859,002.00 | 18,039,254.00         |
| 12_DS_1_S62    | 52,338,258.00  | 33,210,612.00 | 26,393,732.00         |
| 12_DS_2_S63    | 34,494,070.00  | 24,143,684.00 | 22,433,166.00         |
| 12_DS_3_S64    | 38,957,388.00  | 24,213,422.00 | 22,296,134.00         |
| 12_lgG_S68     | 40,479,908.00  | 22,168,700.00 | 16,662,982.00         |



|             |               |               |               |
|-------------|---------------|---------------|---------------|
| 12_WD_1_S65 | 39,362,640.00 | 14,189,274.00 | 10,815,136.00 |
| 12_WD_2_S66 | 43,578,482.00 | 7,697,774.00  | 5,919,686.00  |
| 12_WD_3_S67 | 27,574,516.00 | 4,293,534.00  | 3,495,976.00  |
| 16_DH_1_S69 | 33,757,586.00 | 29,361,130.00 | 23,752,622.00 |
| 16_DH_2_S70 | 33,344,202.00 | 29,017,722.00 | 23,642,692.00 |
| 16_DH_3_S71 | 30,410,508.00 | 26,450,556.00 | 21,805,204.00 |
| 16_DS_1_S72 | 36,357,196.00 | 30,456,338.00 | 28,877,942.00 |
| 16_DS_2_S73 | 29,347,110.00 | 26,841,350.00 | 25,421,054.00 |
| 16_DS_3_S74 | 30,114,608.00 | 23,679,988.00 | 22,187,514.00 |
| 16_lgG_S78  | 25,302,004.00 | 5,882,086.00  | 4,731,038.00  |
| 16_WD_1_S75 | 31,995,666.00 | 13,152,232.00 | 11,088,520.00 |
| 16_WD_2_S76 | 30,265,902.00 | 11,832,936.00 | 10,303,224.00 |
| 16_WD_3_S77 | 28,633,122.00 | 7,582,756.00  | 6,467,248.00  |
| 20_DH_1_S79 | 21,578,164.00 | 18,400,694.00 | 14,638,490.00 |
| 20_DH_2_S80 | 34,264,656.00 | 28,928,486.00 | 24,103,634.00 |
| 20_DH_3_S81 | 29,568,680.00 | 27,069,202.00 | 22,049,074.00 |
| 20_DS_1_S82 | 37,368,162.00 | 33,076,776.00 | 31,023,900.00 |
| 20_DS_2_S83 | 26,879,130.00 | 23,250,150.00 | 21,905,280.00 |
| 20_DS_3_S84 | 28,888,342.00 | 23,754,990.00 | 22,413,478.00 |
| 20_lgG_S88  | 34,850,010.00 | 5,608,916.00  | 4,374,330.00  |
| 20_WD_1_S85 | 22,031,330.00 | 4,625,340.00  | 3,953,072.00  |
| 20_WD_2_S86 | 33,663,820.00 | 3,749,416.00  | 3,002,986.00  |
| 20_WD_3_S87 | 28,524,766.00 | 6,099,688.00  | 4,759,672.00  |
| 0_K2_1_S11  | 38,592,784.00 | 30,304,078.00 | 28,372,604.00 |
| 0_K2_2_S12  | 50,108,656.00 | 37,949,908.00 | 35,239,812.00 |
| 0_K2_3_S13  | 60,436,514.00 | 42,626,340.00 | 39,164,730.00 |
| 0_K3_1_S14  | 46,896,318.00 | 21,782,728.00 | 17,700,696.00 |
| 0_K3_2_S15  | 46,494,206.00 | 22,304,170.00 | 18,191,010.00 |
| 0_K3_3_S16  | 44,252,650.00 | 20,464,314.00 | 16,619,598.00 |
| 4_DH_1_S1   | 49,322,612.00 | 5,530,438.00  | 4,598,906.00  |
| 4_DH_2_S2   | 51,945,794.00 | 7,297,390.00  | 5,914,242.00  |
| 4_DH_3_S3   | 52,749,384.00 | 3,444,340.00  | 2,739,378.00  |
| 4_DS_1_S4   | 52,183,116.00 | 7,318,656.00  | 6,616,086.00  |
| 4_DS_2_S5   | 43,712,404.00 | 4,906,552.00  | 4,527,294.00  |
| 4_DS_3_S6   | 48,815,458.00 | 4,180,178.00  | 3,839,134.00  |
| 4_lgG_S10   | 30,956,338.00 | 776,590.00    | 594,992.00    |
| 4_K2_1_S17  | 45,992,640.00 | 15,045,056.00 | 14,129,568.00 |
| 4_K2_2_S18  | 27,370,070.00 | 9,026,356.00  | 8,379,914.00  |
| 4_K2_3_S19  | 52,109,530.00 | 21,389,512.00 | 20,195,410.00 |
| 4_K3_1_S20  | 29,391,002.00 | 2,025,650.00  | 1,697,494.00  |
| 4_K3_2_S21  | 43,535,218.00 | 3,826,188.00  | 3,223,030.00  |
| 4_K3_3_S22  | 48,075,330.00 | 3,967,366.00  | 3,283,742.00  |
| 4_WD_1_S7   | 80,362,542.00 | 25,203,878.00 | 18,439,628.00 |
| 4_WD_2_S8   | 98,528,138.00 | 25,490,912.00 | 19,413,628.00 |
| 4_WD_3_S9   | 53,818,474.00 | 2,500,754.00  | 2,011,166.00  |
| 8_K2_1_S23  | 39,711,548.00 | 21,397,248.00 | 18,582,456.00 |
| 8_K2_2_S24  | 40,101,454.00 | 26,623,774.00 | 24,153,352.00 |
| 8_K2_3_S25  | 32,906,498.00 | 20,369,976.00 | 18,568,684.00 |
| 8_K3_1_S26  | 38,113,642.00 | 9,817,790.00  | 7,920,204.00  |
| 8_K3_2_S27  | 38,152,118.00 | 11,029,236.00 | 8,797,988.00  |
| 8_K3_3_S28  | 46,712,314.00 | 25,661,040.00 | 20,207,194.00 |
| 12_K2_1_S29 | 36,976,508.00 | 13,069,650.00 | 12,505,044.00 |
| 12_K2_2_S30 | 43,545,256.00 | 14,900,536.00 | 14,182,790.00 |
| 12_K2_3_S31 | 38,718,196.00 | 15,670,436.00 | 14,791,794.00 |
| 12_K3_1_S32 | 43,479,688.00 | 4,752,668.00  | 3,837,618.00  |
| 12_K3_2_S33 | 31,205,306.00 | 1,026,976.00  | 885,716.00    |
| 12_K3_3_S34 | 25,404,798.00 | 1,837,676.00  | 1,448,170.00  |
| 16_K2_1_S35 | 56,577,908.00 | 16,183,532.00 | 15,469,104.00 |
| 16_K2_2_S36 | 38,347,870.00 | 12,287,338.00 | 11,730,840.00 |
| 16_K2_3_S37 | 30,119,956.00 | 11,670,598.00 | 11,138,836.00 |
| 16_K3_1_S38 | 31,721,220.00 | 2,218,408.00  | 1,833,964.00  |
| 16_K3_2_S39 | 27,345,420.00 | 994,878.00    | 859,788.00    |
| 16_K3_3_S40 | 31,164,748.00 | 646,304.00    | 520,608.00    |
| 20_K2_1_S41 | 37,693,126.00 | 10,777,708.00 | 10,177,506.00 |
| 20_K2_2_S42 | 41,456,140.00 | 13,934,760.00 | 12,857,290.00 |
| 20_K2_3_S43 | 30,775,094.00 | 8,892,270.00  | 8,256,114.00  |
| 20_K3_1_S44 | 29,213,312.00 | 8,071,824.00  | 7,547,998.00  |
| 20_K3_2_S45 | 47,298,070.00 | 12,319,872.00 | 11,120,578.00 |
| 20_K3_3_S46 | 63,796,638.00 | 19,151,266.00 | 17,635,486.00 |
| V_DH_1_S47  | 38,354,362.00 | 35,656,150.00 | 28,585,514.00 |
| V_DH_2_S48  | 41,777,574.00 | 36,364,144.00 | 30,996,082.00 |
| V_DH_3_S49  | 37,077,836.00 | 28,418,822.00 | 24,390,660.00 |
| V_DS_1_S50  | 48,050,330.00 | 45,020,544.00 | 43,058,582.00 |
| V_DS_2_S51  | 41,674,098.00 | 38,302,310.00 | 36,794,930.00 |
| V_DS_3_S52  | 43,751,872.00 | 39,941,036.00 | 38,095,330.00 |
| V_lgG_S56   | 31,749,078.00 | 7,375,664.00  | 5,897,488.00  |

```
V_WD_1_S53 21,798,158.00 8,825,170.00 7,582,322.00
V_WD_2_S54 19,607,102.00 6,052,022.00 4,929,324.00
V_WD_3_S55 32,500,474.00 11,400,794.00 9,744,182.00
Z_DH_1_S57 61,270,690.00 16,125,394.00 12,245,922.00
Z_DH_2_S58 64,077,002.00 18,341,110.00 14,615,612.00
Z_DH_3_S59 67,469,872.00 29,555,502.00 23,851,138.00
Z_DS_1_S60 60,843,838.00 51,695,172.00 49,020,160.00
Z_DS_2_S61 53,028,422.00 32,888,186.00 29,970,752.00
Z_DS_3_S62 53,540,328.00 41,497,946.00 37,406,712.00
Z_IgG_S66 52,145,422.00 15,006,002.00 11,835,444.00
Z_WD_1_S63 51,181,810.00 34,580,236.00 27,206,620.00
Z_WD_2_S64 59,028,068.00 33,287,442.00 26,431,774.00
Z_WD_3_S65 60,486,502.00 20,390,910.00 16,681,584.00
```

## Antibodies

H3K4me2: AM 39141, H3K4me3:Epiccypher 13-0041, H3K4me3Q5his: Millipore ABE2570, WDR5: CST D9E11, H3K4me3Q5ser: Millipore ABE2580, Rabbit IgG: Abcam ab172730, H3Q5his: Millipore ABE2578  
All used 1:50 in antibody buffer

## Peak calling parameters

MACS2 was used for peak calling with the following parameters (except for WDR5, which did not use --broad mode): macs2 callpeak \ -t ZT#AntibodyX.merged.bam \ -c ZT#IgG.bam \ -n ZT#AntibodyY\_IgG\_broad \ -f BAMPE -g mm (or hh) --keep-dup all \ --broad \ -q 0.05 \ --broad-cutoff .05 \ --outdir out\_directory

## Data quality

MACS2 peak calling was used with the corresponding IgG control. Peaks were visually inspected in IGV and by heatmap. Peak calling parameters were identical except in some cases where q values of .01 were used to reduce background peaks. Number of called peaks with q-values <.05 or .01 were used and are as follows (Peak-calling .broadPeak and .narrowPeak are available in the GEO submission):  
singleHisHela\_.BROAD.05\_peaks.broadPeak: 17,981 Peaks  
DualHisHela\_.BROAD.05\_peaks.broadPeak: 20,181 Peaks  
K4me2\_ZT0\_IgG.BROAD.01\_peaks.broadPeak: 58,790 Peaks  
K4me3\_ZT0\_IgG.BROAD.05\_peaks.broadPeak: 18,362 Peaks  
WDR5\_16\_IgG.05\_peaks.narrowPeak: 4,873 Peaks

## Software

Sequencing files were demultiplexed using bcl2fastq2 (Illumina, v2.20). Samples were aligned to the hg19 or mm10 genome using bowtie2 (2.5.0), with the following parameters: --local --very-sensitive-local --phred33 -l 10 -X 700 --dovetail --no-unal --no-mixed --no-discordant. Low quality reads were filtered out using Samtools (1.9) with a cutoff MAPQ score of 30, and only unique reads kept for further processing. Unique read files for each replicate/timepoint/antibody were merged and used for peak calling using MACS2 (3.0.0a6) using the callpeaks function with the options -f BAMPE -q 0.05 --broad --broad-cutoff .05, using the corresponding IgG sample as the -c. For visualization, each sample was normalized by scaling the samples based off of the E. coli spike in, and genome coverage tracks (bigwig files) were produced using deepTools (3.5.1) bamCoverage function with the options --binSize 10 --smoothLength 30 --normalizeUsing None --scaleFactor # and using an ENCODE hg19 or mm10 blacklist file (<https://doi.org/10.1038/s41598-019-45839-z>) to discard regions with consistent non-specific signal. Additional code details can be found in the supplemental information
